# Genome Scan for Locus Involved in Mandibular Prognathism in Pedigrees from China

Qin Li<sup>1</sup>, Feng Zhang<sup>2</sup>, Xin Li<sup>2</sup>, Fengshan Chen<sup>1\*</sup>

**1** Department of Orthodontics, Dental School, Tongji University, Shanghai, China, **2** Beijing Institute of Genomics, Chinese Academy of Sciences, Beijing, China

## Abstract

**Background:** It is well known that genetic components play an important role in the etiology of mandibular prognathism, but few susceptibility loci have been mapped.

**Methodology:** In order to identify linkage regions for mandibular prognathism, we analyzed two Chinese pedigrees with 6,090 genome-wide single-nucleotide polymorphism (SNP) markers from Illumina Linkage-12 DNA Analysis Kit (average spacing 0.58 cM). Multipoint parametric and non-parametric (model-free) linkage analyses were used for the pedigrees.

**Principal Finding:** The most statistically significant linkage results were with markers on chromosome 4 (LOD = 3.166 and NPL = 3.65 with rs 875864, 4p16.1, 8.38 cM). Candidate genes within the 4p16.1 include EVC, EVC2.

**Conclusion:** We detected a novel suggestive linkage locus for mandibular prognathism in two Chinese pedigrees, and this linkage region provides target for susceptibility gene identification, a process that will provide important insights into the molecular and cellular basis of mandibular prognathism.

**Citation:** Li Q, Zhang F, Li X, Chen F (2010) Genome Scan for Locus Involved in Mandibular Prognathism in Pedigrees from China. PLoS ONE 5(9): e12678. doi:10.1371/journal.pone.0012678

**Editor:** Katrina Gwinn, National Institutes of Health, United States of America

**Received:** May 30, 2010; **Accepted:** August 18, 2010; **Published:** September 10, 2010

**Copyright:** © 2010 Li et al. This is an open-access article distributed under the terms of the Creative Commons Attribution License, which permits unrestricted use, distribution, and reproduction in any medium, provided the original author and source are credited.

**Funding:** This research was sponsored by Shanghai Pujiang Program, 07pj14081 and Shanghai Key Basic Research Program, 10JC1415500. The funders had no role in study design, data collection and analysis, decision to publish, or preparation of the manuscript.

**Competing Interests:** The authors have declared that no competing interests exist.

\* E-mail: Orthodboy@126.com

## Introduction

Mandibular prognathism (MP) is a common clinical problem all over the world. However, its prevalence varies relative to populations: the highest incidence has been observed in Asian populations (approximately 15%) and the lowest in Caucasian populations (1%) [1,2]. The unique concave profile of mandibular prognathism not only seriously affects the masticatory function but also extremely endangers psychology to patients. Today, this type of disharmony remains difficult for dentists because of varied etiologies and limited understanding of the mandibular growth [3].

It is well known that environmental and genetic components have both contributed to the etiology of mandibular prognathism [4]. Various environmental etiologies, eg. imbalances in the endocrine system and hormones [5], enlarged tonsils [6] have been reported to be involved in the forming of mandibular prognathism. However, there is great interest in the genetic component of the etiology and numerous studies suggest that genetic components play an important role in its etiology [7–10]. But the inheritance pattern of mandibular prognathism is heterogeneous, findings have been reported suggesting autosomal-recessive inheritance, autosomal-dominant inheritance, dominant inheritance with incomplete penetrance or a polygenic model of transmission [11]. Recently Cruz RM [1] examined data on 55 extended families with at least one affected member with MP and performed a complex segregation analysis to access the inheritance pattern. It turned out that the majority of the pedigrees suggested autosomal dominant inheritance.

Recent progress in molecular genetics has enabled the genetic determinant to be approached directly. Genetic linkage maps using various types of polymorphic markers are essential tools in many genetic studies. Short tandem repeat (STR) become popular genetic markers because of their polymorphism and hereditary. Yamaguchi et al [12] and Frazier-Bowers et al [13] performed genome-wide linkage analysis with STR respectively and found out some mandibular prognathism susceptibility loci ----1p36, 6q25, 19p13.2 [12] and 1p22.1, 3q26.2, 11q22, 12q13.13 and 12q23 [13].

As ethnicity is a major risk factor for MP and Chinese pedigrees have never been studied, we speculated as to the existence of a special locus for Chinese Han People. In addition, technological advances in genotyping Single Nucleotide Polymorphisms (SNPs) has caused an increase in their application in linkage mapping studies because of high-throughput. In this study, we recruited two MP pedigrees of Chinese Han People in an attempt to discover a specific locus or the major gene that regulates mandibular growth by performing a genome-wide analysis with SNPs.

## Results

### Phenotypic characterization (cephalometric analysis)

When compared with normative cephalometric standards of China [14], no subjects had undergrowth of maxilla relative to normal maxillary length (ANS-Ptm, anterior nasal spine-pterygo-maxillary fissure). Three subjects were under 18 years old and

**Table 1.** The cephalometric variables that differ between affected and unaffected individuals.

| cephalometric measure | Affected members |      | Unaffected members |      | Norms |     |
|-----------------------|------------------|------|--------------------|------|-------|-----|
|                       | Mean             | SD   | Mean               | SD   | Mean  | SD  |
| SNA                   | 81.34            | 3.03 | 84.32              | 4.16 | 82.8  | 4.1 |
| SNB                   | 84.47            | 2.93 | 80.37              | 2.34 | 80.1  | 3.9 |
| ANB                   | -3.13            | 2.64 | 4.05               | 2.13 | 2.7   | 2.1 |
| Wits(mm)              | -6.25            | 3.72 | 3.14               | 2.67 | -1.2  | 2.5 |
| ANS-Ptm(mm)           | 52.49            | 2.86 | 54.36              | 3.24 | 51.1  | 2.6 |
| Co-Po(mm)             | 117.18           | 3.03 | 107.47             | 3.79 | 110.2 | 3.8 |

## Footnotes:

\*, cephalometric standards of China.

ANB, anteroposterior relationship of the maxilla and mandible.

SNA, anteroposterior maxillary position to anterior cranial plane.

SNB, anteroposterior mandibular position to anterior cranial plane.

Wits (mm), length of AO-BO distance.

ANS-Ptm (mm), maxillary unit length.

Co-Po (mm), mandibular unit length.

doi:10.1371/journal.pone.0012678.t001

were diagnosed as affected individuals with a negative ANB angle and normal maxillary length. The cephalometric variables that differ between affected and unaffected individuals are shown in Table 1.

### Genome-wide linkage analysis

Pedigree analysis by visual inspection suggested an autosomal-dominant inheritance with incomplete penetrance. Multipoint parametric and non-parametric linkage scores obtained from the 0.58-cM resolution genome-wide scan revealed that only one chromosomal locus provided evidence of linkage: 4p16.1 (LOD = 3.166 and NPL = 3.65 with rs 875864, 4p16.1, 8.38 cM). The multi-point linkage results on chromosome 4p16.1 are shown in Figure 1 and Table 2. Both of LOD values of the respective pedigree were larger than 1, which means both of the pedigrees showed linkage to this region and no genetic heterogeneity was observed between the two pedigrees.

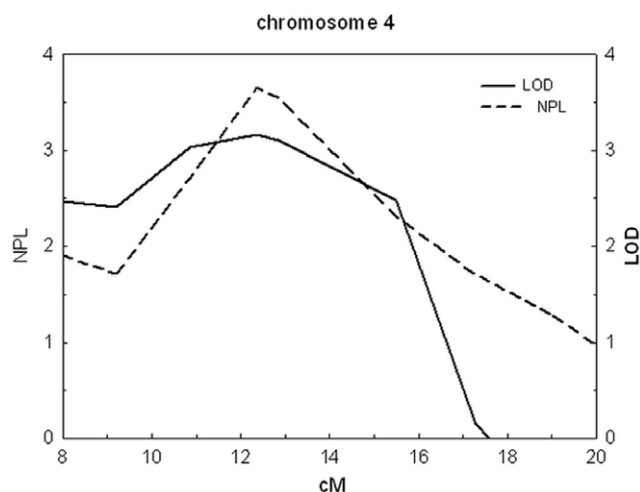

**Figure 1.** Chart of LOD and NPL value on 4p16.1. X axis indicates position from p terminus of chromosome (cM). Dashed line indicates LOD scores, and solid line indicates NPL scores. LOD: logarithm (base 10) of odds. NPL: value of non-parametric linkage analysis. doi:10.1371/journal.pone.0012678.g001

These data substantiated the linkage signals of the susceptibility locus on 4p16.1 from our MP pedigrees. We further identified candidate genes of biologic interest for the locus using biologic approaches (<http://www.ncbi.nlm.nih.gov>). This search revealed that human genes EVC, EVC2 are within this region.

### Discussion

Identification of genetic susceptibilities to MP is the first step toward understanding the molecular pathogenesis of MP. Although the previous studies [12,13] have determined some loci susceptible for MP, we found out a novel locus in Chinese Han People with slightly higher NPL and LOD scores.

There are various skeletal types of Class III malocclusion, such as mandibular protrusion, maxillary retrusion or a combination of both [15]. To minimize the possibility of heterogeneity, we chose one ethnicity and focused on one subtype of skeletal Class III—mandibular prognathism. In this study, the genetic marker—SNPs we used were different from STR which were used in previous

**Table 2.** The multi-point linkage results on 4p16.1.

| locus  | marker    | position from pter(cM) | NPL  | LOD   |
|--------|-----------|------------------------|------|-------|
| 4p16.1 | rs934498  | 7.11                   | 2.01 | 2.496 |
| 4p16.1 | rs920683  | 7.16                   | 2.03 | 2.503 |
| 4p16.1 | rs873924  | 7.18                   | 2.03 | 2.503 |
| 4p16.1 | rs2654498 | 9.21                   | 1.71 | 2.403 |
| 4p16.1 | rs726111  | 10.85                  | 2.71 | 3.308 |
| 4p16.1 | rs875864  | 12.37                  | 3.65 | 3.166 |
| 4p16.1 | rs7658616 | 12.46                  | 3.63 | 3.156 |
| 4p16.1 | rs875579  | 12.86                  | 3.54 | 3.106 |
| 4p16.1 | rs1173466 | 15.49                  | 2.31 | 2.745 |

## Footnotes:

Locus: map position as identified by the marker.

cM: centimorgans.

pter: p terminus of chromosome.

LOD: logarithm (base 10) of odds.

NPL: value of non-parametric linkage analysis.

doi:10.1371/journal.pone.0012678.t002

similar studies[12,13]. Eventhough the genetic polymorphism of SNPs cannot be compared to STR, an increased number of markers (6090), which are evenly spaced and cover a high proportion of the genome, can make up for this low-variability deficiency. In addition, compared to STR, SNP genotyping platforms are almost fully automated and error rates tend to be much lower which improves accuracy of genetic map[16]. As the markers we used in this study were dense enough, with an average 0.58 cM genetic map spacing and an average 441 kb physical map spacing, a fine-mapping with more markers in the region of interest was unnecessary.

In searching for an genetic linked region, it is important to distinguish between pointwise (also called nominal) significance levels and genome-wide significance levels. As multipoint parametric and non-parametric (model-free) multipoint linkage analyses were performed, we identified susceptible locus according to both these results—the value of NPL and LOD. The linkage analyses results revealed a new locus—4p16.1 (LOD = 3.166 and NPL = 3.65 with rs 875864, 4p16.1, 8.35 cM). Taking into account for both values, we considered 4p16.1 as a novel locus genetic linked to MP.

There are 23 function genes in the region. It harbors positional candidate genes of interest such as EVC and EVC2. EVC2 encodes a protein that functions in bone formation and skeletal development. Mutations in this gene[17,18], as well as in a neighboring gene—EVC which lies in a head-to-head configuration, cause an autosomal recessive skeletal dysplasia that is also known as chondroectodermal dysplasiab or cause acrofacial dysostosis Weyers type, a disease that combines limb and facial abnormalities. As the mutations in these genes always cause skeletal dysplasia, we suggest that some novel mutations in EVC2 and EVC may be relevant to the form of mandibular prognathism.

In summary, when performing a genome-wide linkage analysis with two mandibular prognathism pedigrees of Chinese Han people, we detected a novel chromosomal region—4p16.1 potentially linked to mandibular prognathism. EVC2 and EVC were considered as candidate genes to influence the bone tissue. To efficiently identify the mutations that may be responsible for this disease, second-generation sequencing with Solexa technology will soon be carried out within this candidate region. The findings in the current study can be combined with those from previous studies to further understand the genetic basis of mandibular prognathism.

## Materials and Methods

### Disease Criteria and Pedigree Recruitment

The protocols for the current study, as well as participant consent, were reviewed and approved by the institutional review board at Tongji University Dental School. Consent to participate in this study (including a release for dental records) was obtained from every adult participant or in the case of minors from a parental guardian. The consent was written.

The family structure was as follows: pedigrees comprised of 4 generations with a total of 42 individuals containing 18 affected individuals. The age range was between 12 and 64 years, the average age being 38.7 years. All of the samples were drawn from China. These two pedigrees were not biologically related and were from different provinces. The pedigree charts were shown in Figure 2.

The subjects were first diagnosed by lateral cephalogram, in conjunction with orthodontic study models or visual inspection. Subjects were diagnosed as affected individuals if they had an ANB angle (Point A-Nasion-Point B) of centric jaw relationship

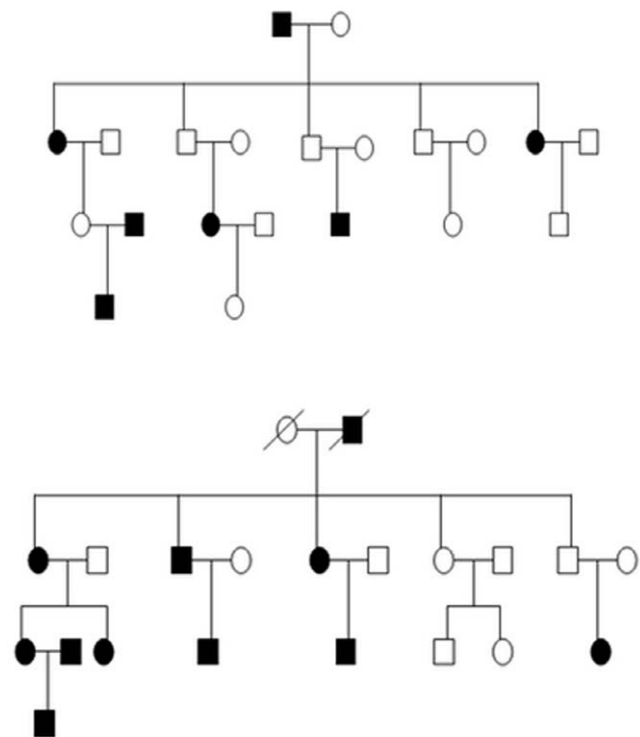

**Figure 2. The pedigree chart of mandibular prognathism families.** The mandibular prognathism samples are indicated by darkened (affected) circles or squares. The squares indicate male; the circles indicate female; the diagonal lines indicate deceased family members.

doi:10.1371/journal.pone.0012678.g002

under 0.0 degrees[1,12] and a negative Wits appraisal greater than  $-2.0$  mm [3]. The total length of the mandible was evaluated by the Condylion-Pogonion distance. No subjects had severe undergrowth of maxilla relative to normal maxillary length (ANS-Ptm, anterior nasal spine-pterygomaxillary fissure). Three subjects were under 18 years old and were diagnosed as affected individuals with a negative ANB angle and normal maxillary length. The dentofacial phenotype of the deceased individuals was confirmed by their offsprings. None of the participants had a congenital disorder such as cleft palate or physical diseases.

### Cephalometric Analysis

The cephalometric tracing were performed by at least two orthodontists. Eighteen cephalometric parameters were used for diagnosis of the samples. Cephalometric tracing and major measurements were followed as figure 3.

### Power Estimation

The power to detect linkage was calculated using the program SLINK with 500 replicates. This pedigree showed an maximum LOD score of 4.5, assuming an autosomal-dominant model with incomplete penetrance of 0.95[19] and a phenocopy rate of 0.005. The power to detect LODs scores greater than 2 and 3 were 75% and 41%, respectively.

### Genotyping and Linkage Analysis

Genomic DNA was isolated from whole blood cells with the use of a QIAamp DNA Blood Kit (QIAGEN GmbH, Hilden, Germany). Genotyping was carried out with Illumina Linkage-12

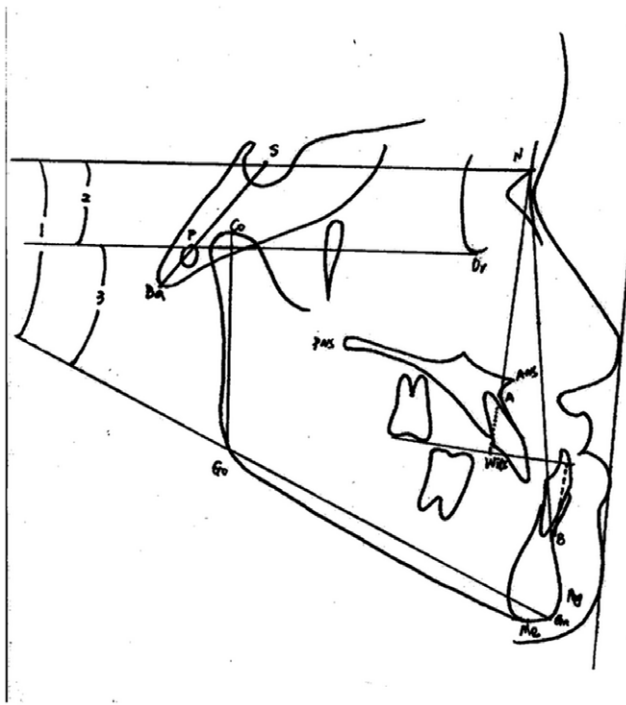

**Figure 3. Cephalometric tracing and major measurements.** Co-Gn (mm), mandibular unit length; Go-Gn (mm), mandibular corpus length; SN (mm) anteroposterior length of cranial base; wits (mm), length of distance AO-BO; ANB, anteroposterior relation of maxilla and mandible; SNA, anteroposterior maxillary position to anterior cranial plane; SNB, anteroposterior mandibular position to anterior cranial plane; SN to GoGn (angle 1), inclination of SN to mandibular plane GoGn; SN to FH (angle 2), inclination of SN to FH plane; FH to GoGn (angle 3), inclination of FH to mandibular plane GoGn.  
doi:10.1371/journal.pone.0012678.g003

## References

- Cruz RM, Krieger H, Ferreira R, Mah J, Hartsfield Jr., et al. (2008) Major gene and multifactorial inheritance of mandibular prognathism. *Am J Med Genet A* 146: 71–77.
- Bukhary MT (2005) Comparative cephalometric study of Class III malocclusion in Saudi and Japanese adult females. *J Oral Sci* 47: 83–90.
- Alexander AE, McNamara JA, Jr., Franchi L, Baccetti T (2009) Semilongitudinal cephalometric study of craniofacial growth in untreated Class III malocclusion. *Am J Orthod Dentofacial Orthop* 135: 700.e1–14.
- Jena AK, Duggal R, Mathur VP, Parkash H (2005) Class - III malocclusion: Genetics or environment? A twins study. *J Indian Soc Pedod Prev Dent* 23: 27–30.
- Pascoe JJ, Hayward JR, Costich ER (1960) Mandibular prognathism: its etiology and a classification. *J Oral Surg* 18: 21–24.
- McNamara JA Jr. (1984) A method of cephalometric evaluation. *Am J Orthod* 86: 449–469.
- Wolff G, Wienker TF, Sander H (1993) On the genetics of mandibular prognathism: analysis of large European noble families. *J Med Genet* 30: 112–116.
- Litton SF, Ackermann LV, Isaacson RJ, Shapiro BL (1970) A genetic study of Class III malocclusion. *Am J Orthod* 58: 565–577.
- Watanabe M, Suda N, Ohyama K (2005) Mandibular prognathism in Japanese families ascertained through orthognathically treated patients. *Am J Orthod Dentofacial Orthop* 128: 466–470.
- El-Gheriani AA, Maher BS, El-Gheriani AS, Sciote JJ, Abu-Shahba FA, et al. (2003) Segregation analysis of mandibular prognathism in Libya. *J Dent Res* 82: 523–527.
- Chang HP, Tseng YC, Chang HF (2006) Treatment of mandibular prognathism. *J Formos Med Assoc* 105: 781–790.
- Yamaguchi T, Park SB, Narita A, Maki K, Inoue I (2005) Genome-wide linkage analysis of mandibular prognathism in Korean and Japanese patients. *J Dent Res* 84: 255–259.
- Frazier-Bowers S, Rincon-Rodriguez R, Zhou J, Alexander K, Lange E (2009) Evidence of linkage in a Hispanic cohort with a Class III dentofacial phenotype. *J Dent Res* 88: 56–60.
- Fu MK, Lin JX (2005) *Orthodontics*. 1st rev. ed. Beijing: Peking University Medical Press.
- Staudt CB, Kiliaridis S (2009) Different skeletal types underlying Class III malocclusion in a random population. *Am J Orthod Dentofacial Orthop* 136: 715–721.
- Ball AD, Stapley J, Dawson DA, Birkhead TR, Burke T, et al. (2010) A comparison of SNPs and microsatellites as linkage mapping markers: lessons from the zebra finch (*Taeniopygia guttata*). *BMC Genomics* 11: 218.
- Ruiz-Perez VL, Tompson SW, Blair HJ, Espinoza-Valdez C, Lapunzina P, et al. (2003) Mutations in two nonhomologous genes in a head-to-head configuration cause Ellis-van Creveld syndrome. *Am J Hum Genet* 72: 728–732.
- Ulucan H, Gül D, Sapp JC, Cockerham J, Johnston JJ, et al. (2008) Extending the spectrum of Ellis van Creveld syndrome: a large family with a mild mutation in the EVC gene. *BMC Med Genet* 23;9: 92.
- Chen YJ (2010) The study of pathogenic mechanism of Class III malocclusion. *ChongQing Med* 39;3: 358–360.
- Kruglyak L, Daly MJ, Reeve-Daly MP, Lander ES (1996) Parametric and nonparametric linkage analysis: a unified multipoint approach. *Am J Hum Genet* 58: 1347–1363.
- Abecasis GR, Cherny SS, Cookson WO, Cardon LR (2002) Merlin—rapid analysis of dense genetic maps using sparse gene flow trees. *Nat Genet* 30: 97–101.
- O'Connell JR, Weeks DE (1998) PedCheck: a program for identification of genotype incompatibilities in linkage analysis. *Am J Hum Genet* 63: 259–266.

DNA Analysis Kit (Human) (Illumina, San Diego, USA). A Genome scan was performed with a total of 6090 single-nucleotide polymorphism (SNP) markers, having average 0.58 cM genetic map spacing and average 441 kb physical map spacing. The average minor allele frequency observed in the Asian sample group was 0.28.

Multipoint parametric and non-parametric (model-free) multipoint linkage analyses were performed on the family of the subjects. Non-parametric linkage (NPL) analysis, which has been described as a powerful approach compared with the commonly used parametric methods[20], was run to account for the possibility of alternative modes of inheritance. As the literature strongly favors an autosomal-dominant inheritance of mandibular prognathism, and our pedigree analyses by inspection also suggested this pattern, we assumed an autosomal-dominant inheritance with incomplete penetrance of 0.95 and phenocopy rate of 0.005 for the parametric analysis and an affected allele frequency of 0.0001 via the program MERLIN version 1.01[21]. The reported linkage scores were from the joint analysis of the two families. Marker allele frequencies were estimated from the founders of the pedigree via MERLIN. Mendelian inconsistencies of the genotype data were investigated with Pedcheck version 1[22] and improper genotypes were set to missing before the linkage analysis.

## Acknowledgments

We gratefully appreciate the support of this family and dentists who participated in this study.

## Author Contributions

Conceived and designed the experiments: FC. Performed the experiments: QL. Analyzed the data: XL. Contributed reagents/materials/analysis tools: FZ. Wrote the paper: QL.
